# Supplementary material
Source: publisher figshare collection journal article supplement (https://acs.figshare.com/ndownloader/files/14619065)
Supplement: Supplementary file 1 [file 14619065]

# Supporting Information

## Boron-Doped Spherical Hollow-Porous Silicon Local Lattice Expansion toward a High-Performance Lithium-Ion-Battery Anode

*Yongpeng Ren,<sup>†</sup> Xiangyang Zhou,<sup>†</sup> Jingjing Tang,<sup>†</sup> Jing Ding,<sup>†</sup> Song Chen,<sup>†</sup> Jiaming Zhang,<sup>†</sup> Tingjie Hu,<sup>†</sup> Xu-Sheng Yang,<sup>\*,‡</sup> Xinming Wang,<sup>§</sup> and Juan Yang,<sup>\*,†</sup>*

<sup>†</sup> School of Metallurgy and Environment, Central South University, Changsha 410083, China.

<sup>‡</sup> Advanced Manufacturing Technology Research Centre, Department of Industrial and Systems Engineering, The Hong Kong Polytechnic University, Hung Hom, Kowloon, Hong Kong, China

<sup>§</sup> School of Materials Science and Engineering, Xiangtan University, Xiangtan, China

\*Corresponding author.

\* E-mail: xsyang@polyu.edu.hk, (X. Yang)

\* E-mail: j-yang@csu.edu.cn, (J. Yang)

$$\rho_{Si} = \frac{1.305 \times 10^{16}}{N} + \frac{1.133 \times 10^{17}}{N \times \left[ 1 + (N \times 2.58 \times 10^{-9})^{-0.737} \right]}$$

S1

$\rho_{Si}$ , resistivity of B doped crystal Si,  $\Omega$  cm

$N$ , atomic density of boron atom in Si,  $\text{cm}^{-3}$

**Table S1** B contents in Si and  $\text{SiO}_2$  based on ICP-AES measurements and the calculated resistivity values

|                                                      | B contents<br>In<br>$\text{SiO}_2$ (wt%) | B contents<br>In Si (wt%) | Atomic density<br>of B ( $\text{cm}^{-3}$ ) | Resistivity ( $\Omega$ cm) |
|------------------------------------------------------|------------------------------------------|---------------------------|---------------------------------------------|----------------------------|
| B0                                                   | <0.001                                   | <0.001                    | $\sim 5 \times 10^{17}$                     | $\sim 0.22$                |
| B1                                                   | 0.038                                    | 0.014                     | $0.18 \times 10^{20}$                       | $5.48 \times 10^{-3}$      |
| B2                                                   | 0.093                                    | 0.029                     | $0.38 \times 10^{20}$                       | $2.86 \times 10^{-3}$      |
| B-HPSi<br>(B-HSiO <sub>2</sub> )                     | 0.16                                     | 0.057                     | $0.74 \times 10^{20}$                       | $1.55 \times 10^{-3}$      |
| Saturated<br>solution of B<br>(theoretical<br>value) | —                                        | 0.17%                     | $2.2 \times 10^{20}$                        | $5.49 \times 10^{-4}$      |

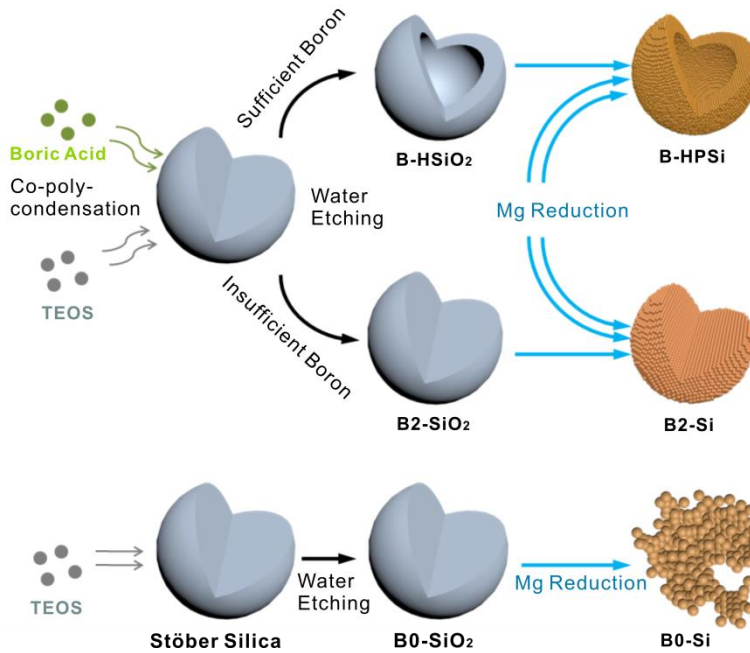

**Figure S1.** Synthetic paths of B-HPSi, B2-Si and B0-Si

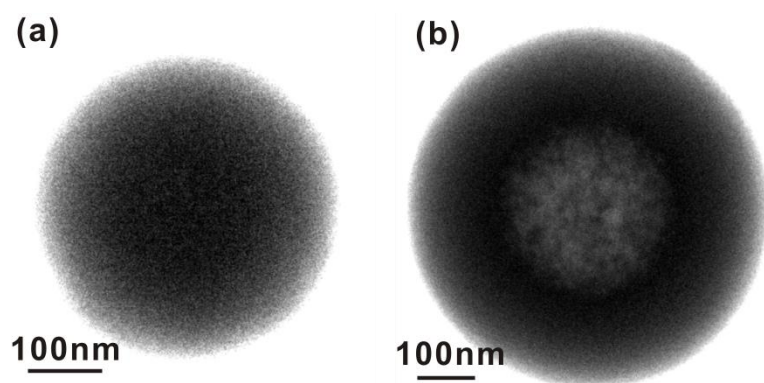

**Figure S2.** Contrast adjusted TEM images of (a) solid silica spheres without boron addition (B0-SiO<sub>2</sub>) and (b) hollow spheres with proper boron addition (B-HSiO<sub>2</sub>)

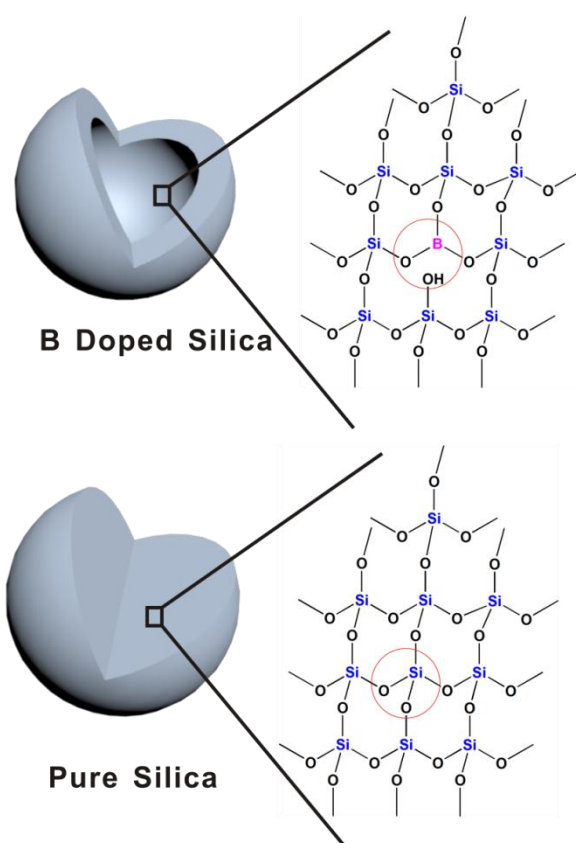

**Figure S3.** Illustration of a boron atom with lower coordination number in Si-O framework

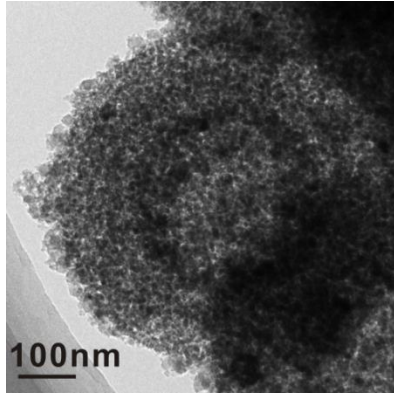

**Figure S4.** Enlarged TEM image of B-HPSi

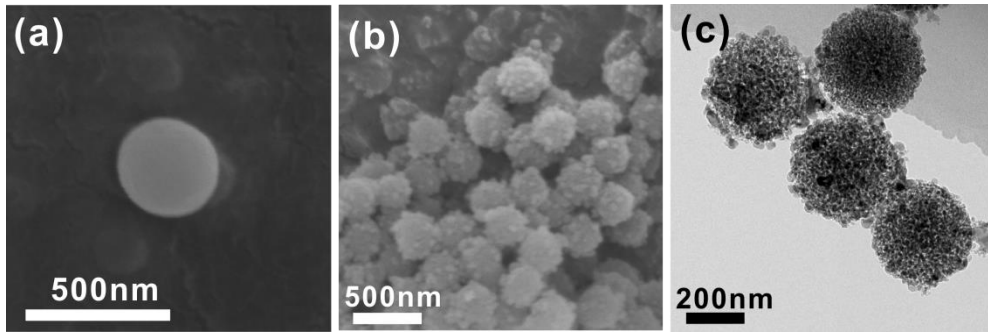

**Figure S5.** SEM images of (a) B2-SiO<sub>2</sub>, (b) B2-Si and (c) TEM image of B2-Si

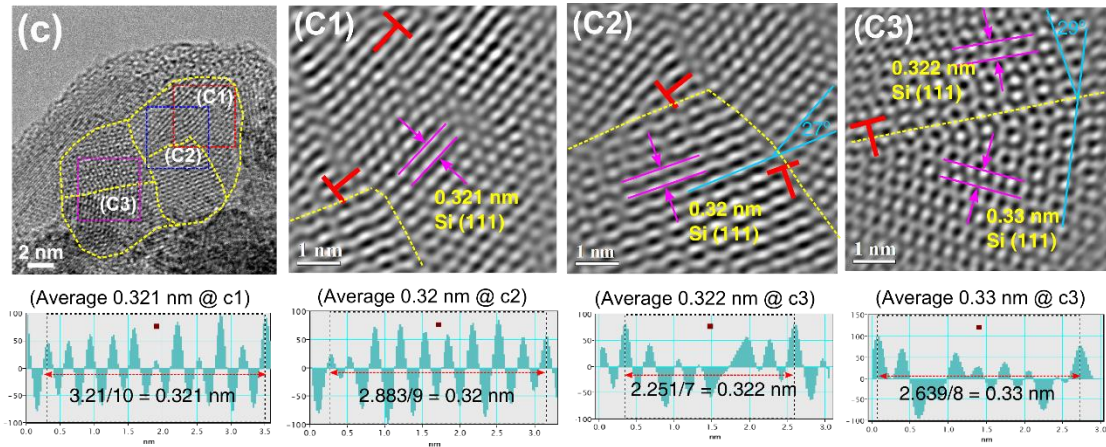

**Figure S6.** HRTEM image of B-HPSi (c) and the Fourier-filtered HRTEM images (C1-C3) enlarged from the rectangular regions marked C1, C2, and C3 in (c); and the corresponding the intensity profiles for measuring the interplanar spacing of Si (111) planes.

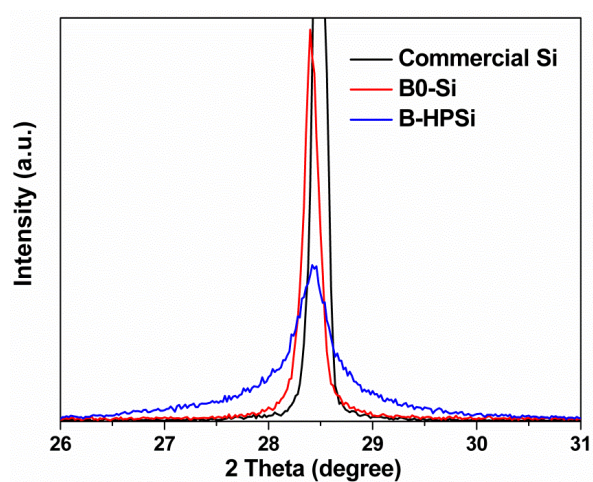

**Figure S7.** Detailed XRD patterns of B-HPSi, B0-Si and commercial Si

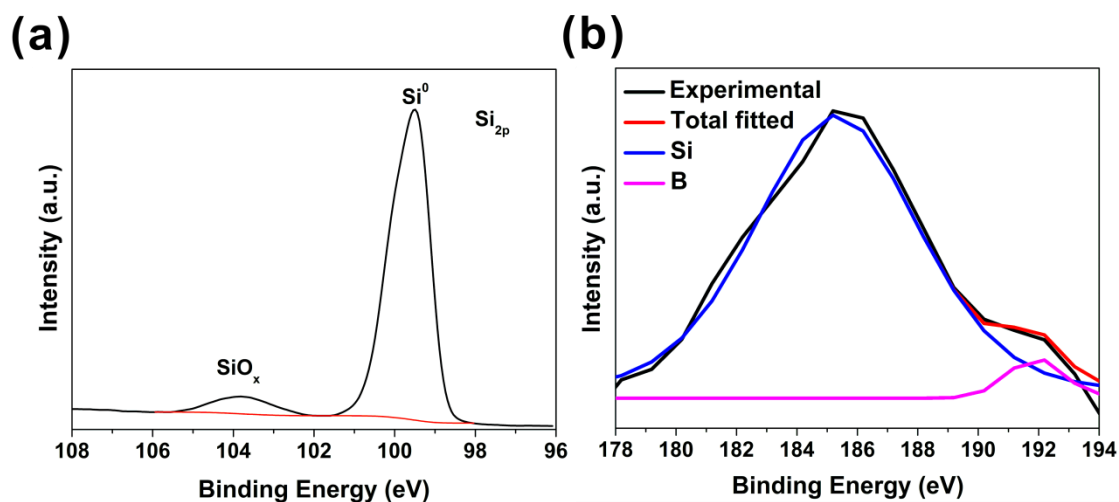

**Figure S8.** (a) Si and (b) B peaks of XPS of B-HPSi

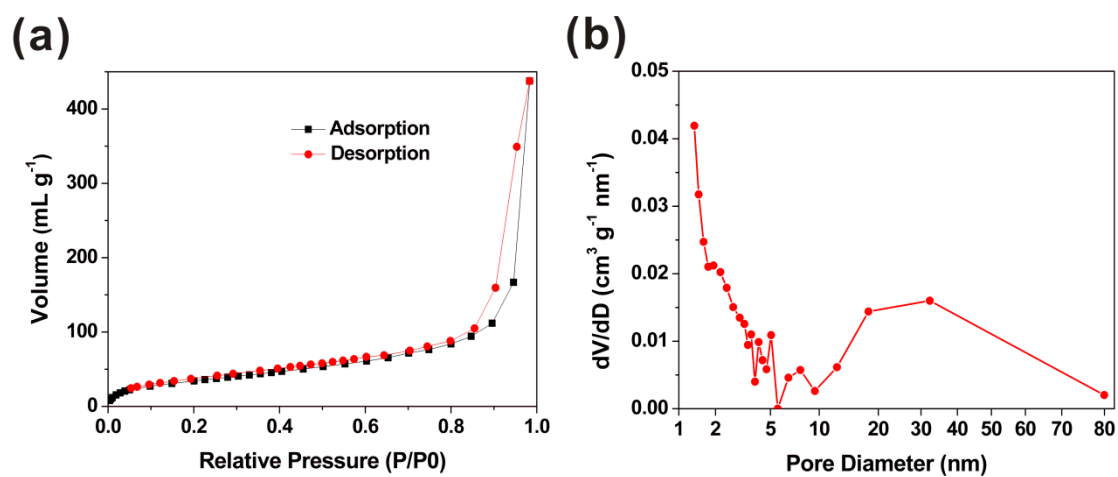

**Figure S9.** N<sub>2</sub> adsorption/desorption data (a) and differential pore size distribution (b) of B-HPSi

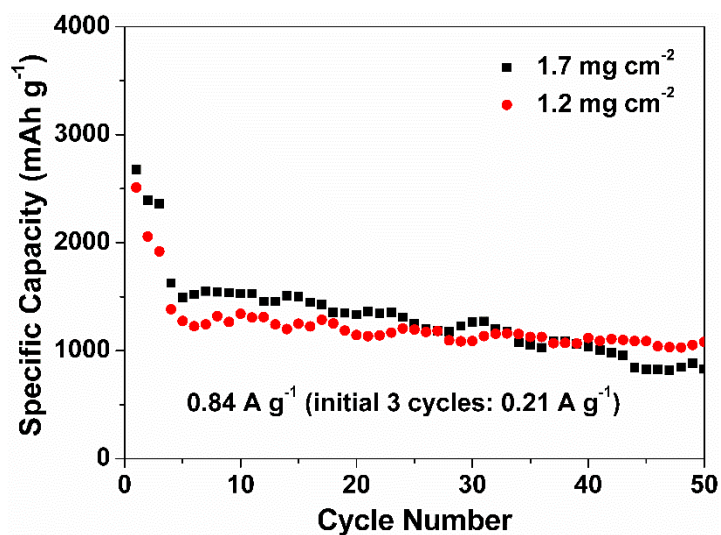

**Figure S10.** Cyclic performances of B-HPSi under areal mass loading of  $1.2 \text{ mg cm}^{-2}$  and  $1.7 \text{ mg cm}^{-2}$

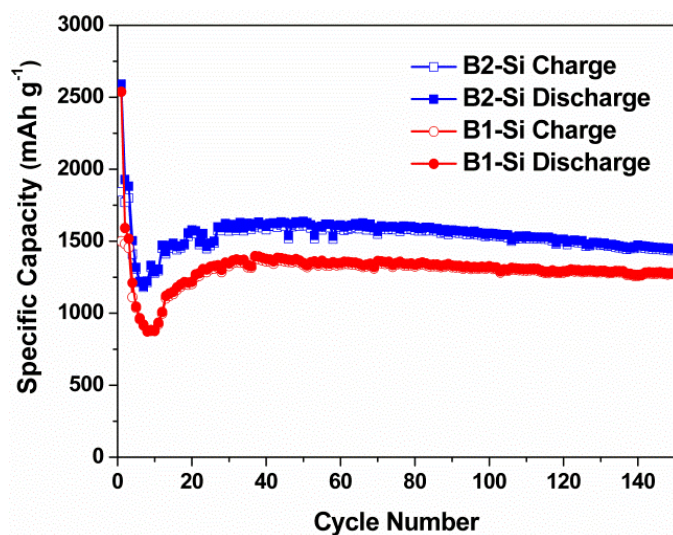

**Figure S11.** Cycle performances at  $0.84 \text{ A g}^{-1}$  of B1-Si and B2-Si (activated at  $0.21 \text{ A g}^{-1}$  for the initial 3 cycles)



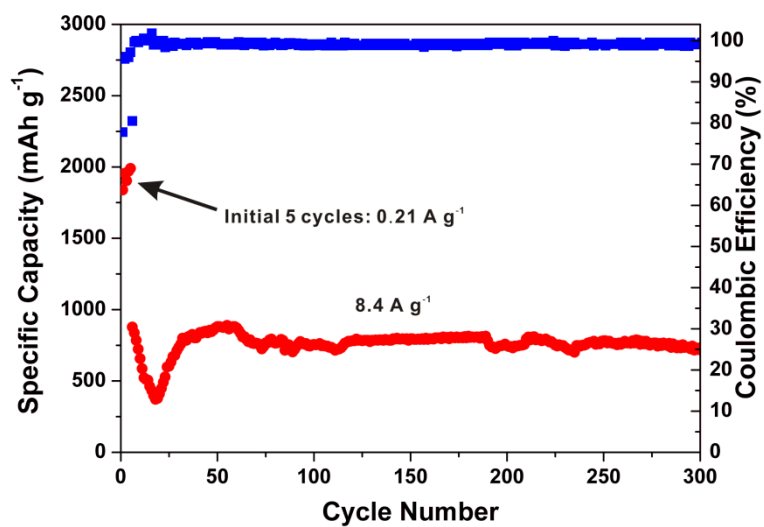

**Figure S12.** Cyclic performances of B-HPSi at  $8.4 \text{ A g}^{-1}$  (activated at  $0.21 \text{ A g}^{-1}$  for the initial 5 cycles)

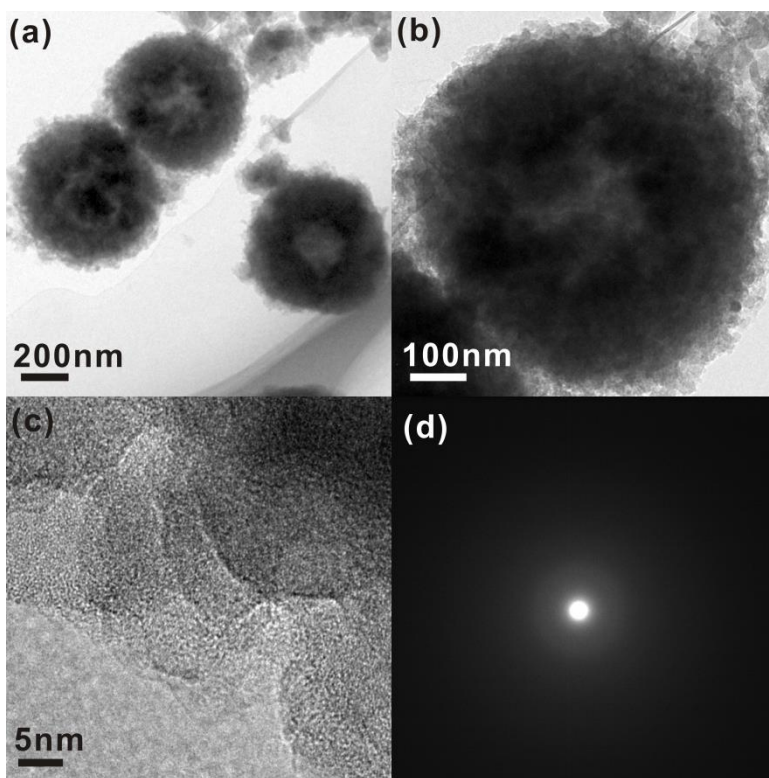

**Figure S13.** TEM (a) and (b), HRTEM (c) and SAED (d) of B-HPSi anode obtained after cycling

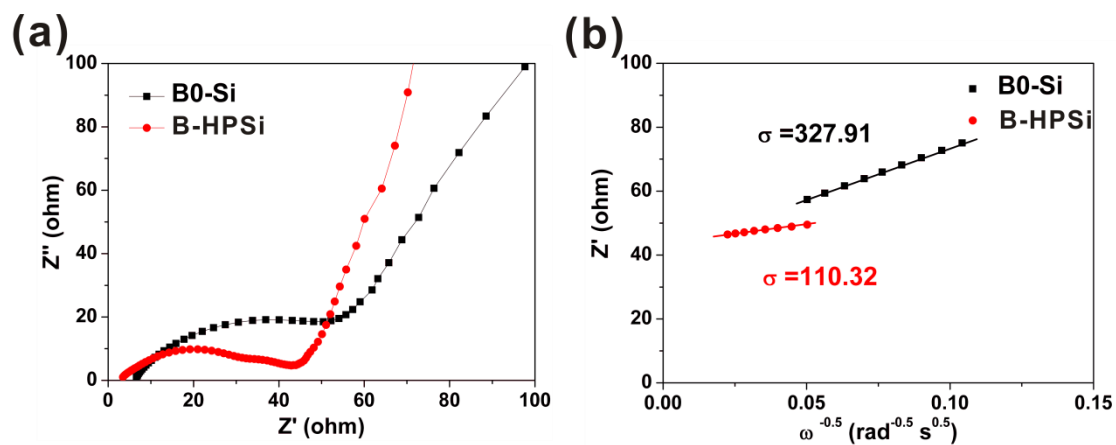

**Figure S14.** Nyquist plots (a) and Warburg coefficients (b) of B-HPSi and B0-Si

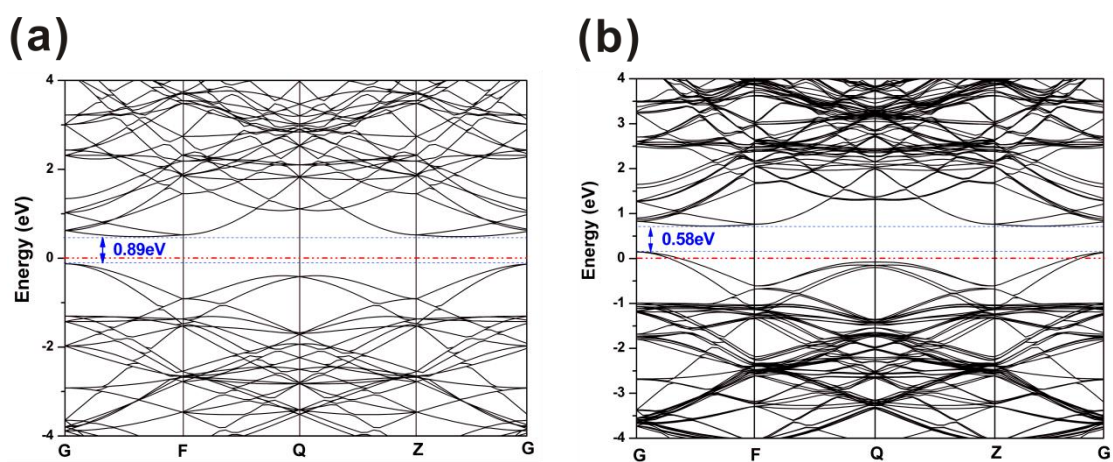

**Figure S15.** Simulated band structure of pure Si (a) and B-doped Si (b)

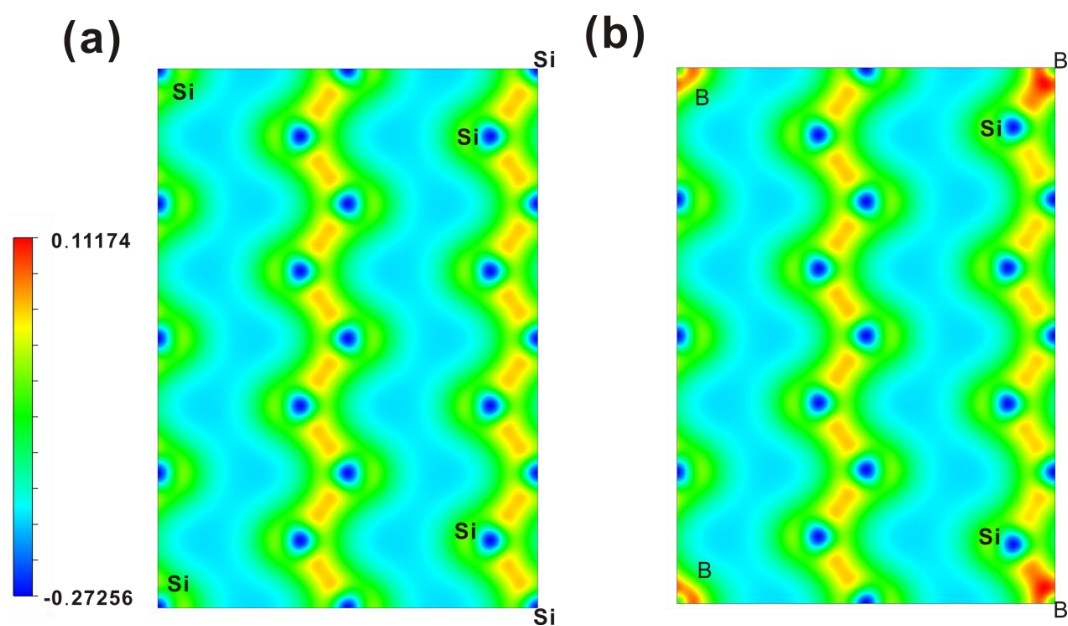

**Figure S16.** Simulated charge density plots of pure Si (110) (a) and B doped Si (110) (b)
